# Supplementary material
Source: HighWire-hosted journal article supplement (https://erj.ersjournals.com/content/55/4/2000267)
Supplement: inline-supplementary-material-1 [file inline-supplementary-material-1.pdf]

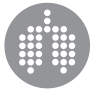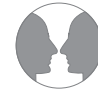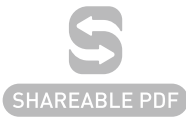

# Making simple things complicated using anti-inflammatory reliever therapy

Brian Lipworth, Chris RuiWen Kuo and Rory Chan

**Affiliation:** Scottish Centre for Respiratory Research, University of Dundee, Ninewells Hospital and Medical School, Dundee, UK.

**Correspondence:** Brian Lipworth, Scottish Centre for Respiratory Research, University of Dundee, Ninewells Hospital and Medical School, Dundee, DD1 9SY, Scotland, UK. E-mail: b.j.lipworth@dundee.ac.uk

@ERSpublications

Use more budesonide/formoterol when you need it, and less when you don't <http://bit.ly/2PKsCOH>

**Cite this article as:** Lipworth B, Kuo CRW, Chan R. Making simple things complicated using anti-inflammatory reliever therapy. *Eur Respir J* 2020; 55: 2000267 [<https://doi.org/10.1183/13993003.00267-2020>].

This single-page version can be shared freely online.

## To the Editor:

We appreciated reading the eloquent editorial from BEASLEY *et al.* [1], who make a cogent evidence-based case for using budesonide/formoterol (BUD/FM) on demand (*p.r.n.*) as the preferred asthma reliever, in keeping with the latest GINA guidelines. They proffer what appears at first sight to be a pragmatic stepwise treatment algorithm and associated action plan for using BUD/FM *p.r.n.* as anti-inflammatory reliever (AIR)±maintenance therapy across Global Initiative for Asthma steps 1 to 3.

Copyright ©ERS 2020

Name: ..... Doctor: ..... Date of plan: .....

### Asthma action plan using your budesonide/formoterol 200/6 µg (Symbicort) on demand<sup>#</sup>

Use more puffs when you need it,  
less when you don't

Up to 8 puffs per day  
depending on symptoms

Seek medical advice if you need  
≥8 puffs per day on a regular basis<sup>¶</sup>
